# Supplementary material for: Influence of GEOTRACES data distribution and misfit function choice on objective parameter retrieval in a marine zinc cycle model
Source: Copernicus journal article supplement (doi:10.5194/bg-2022-105), 2022-06-03
Supplement: Supplementary file 1 [file bg-2022-105-supplement.pdf]

**Table S1.** Overview of misfit functions that are applied in each experiment type.

|                  | RMSE | VolRMSE | BasinRMSE | VarRMSE | RMAE | BasinRMAE |
|------------------|------|---------|-----------|---------|------|-----------|
| TWIN             | ✓    |         |           |         |      |           |
| TWIN_IDP         | ✓    |         |           |         |      |           |
| synObs_ALL_noise | ✓    |         |           |         |      |           |
| synObs_IDP_noise | ✓    | ✓       |           | ✓       |      |           |
| synObs_ALL_seas  | ✓    | ✓       |           |         | ✓    |           |
| synObs_IDP+_seas | ✓    |         |           |         |      |           |
| synObs_IDP_seas  | ✓    | ✓       | ✓         |         | ✓    | ✓         |
| synObs_ALL_circ  | ✓    | ✓       |           |         | ✓    |           |
| synObs_IDP+_circ | ✓    |         |           |         | ✓    | ✓         |
| synObs_IDP_circ  | ✓    | ✓       | ✓         |         | ✓    | ✓         |

**Table S2.** Overview of the optimisation results (parameter values obtained with the best individual in the last generation, its misfit, and the globally integrated Zn uptake flux, as well as the total number of iterations until a termination criterion was reached and the misfit calculated with reference parameter values). Numbers specified in percentage refer to the relative difference from the reference parameter values or the reference misfit, and are coloured in red or blue when they underestimate or overestimate the corresponding value by more than 10% respectively.

| Experiment type  | Misfit metric | $a_{zn}$              | $b_{zn}$              | $c_{zn}$               | $L$                   | Number of iterations | $M_{reference}$                                              | $M_{optimised}$                                              | Globally integrated Zn export flux |
|------------------|---------------|-----------------------|-----------------------|------------------------|-----------------------|----------------------|--------------------------------------------------------------|--------------------------------------------------------------|------------------------------------|
|                  |               | (-)                   | ( $\mu\text{M}$ )     | ( $\mu\text{M}^{-1}$ ) | ( $\mu\text{M}$ )     |                      | ( $\mu\text{M}$ )<br>or<br>( $\mu\text{M}^{1/2}$ )<br>or (-) | ( $\mu\text{M}$ )<br>or<br>( $\mu\text{M}^{1/2}$ )<br>or (-) | ( $\text{Mmol yr}^{-1}$ )          |
| reference        |               | $6.00 \times 10^{-3}$ | $3.00 \times 10^{-5}$ | 0.320                  | $1.20 \times 10^{-3}$ |                      |                                                              |                                                              | 27.085                             |
| TWIN_ALL         | RMSE          | $6.00 \times 10^{-3}$ | $3.00 \times 10^{-5}$ | 0.320                  | $1.20 \times 10^{-3}$ | 126                  |                                                              | 4.483E-09                                                    | 27.085                             |
|                  |               | -0.01%                | +0.03%                | +0.12%                 | -0.03%                |                      |                                                              |                                                              | 0.00%                              |
| TWIN_IDP         | RMSE          | $6.00 \times 10^{-3}$ | $3.00 \times 10^{-5}$ | 0.320                  | $1.20 \times 10^{-3}$ | 153                  |                                                              | 2.310E-09                                                    | 27.085                             |
|                  |               | 0.00%                 | +0.01%                | -0.02%                 | -0.01%                |                      |                                                              |                                                              | 0.00%                              |
| synObs_ALL_noise | RMSE          | $6.19 \times 10^{-3}$ | $2.89 \times 10^{-5}$ | 0.182                  | $1.38 \times 10^{-3}$ | 95                   | $2.207 \times 10^{-4}$                                       | $2.205 \times 10^{-4}$                                       | 27.019                             |
|                  |               | +3.14%                | -3.68%                | <b>-42.98%</b>         | <b>+15.16%</b>        |                      |                                                              | -0.07%                                                       | -0.24%                             |
| synObs_IDP_noise | RMSE          | $6.10 \times 10^{-3}$ | $3.87 \times 10^{-5}$ | 0.160                  | $1.02 \times 10^{-3}$ | 185                  | $1.728 \times 10^{-4}$                                       | $1.727 \times 10^{-4}$                                       | 27.058                             |
|                  |               | +1.74%                | <b>+28.90%</b>        | <b>-50.00%</b>         | <b>-15.08%</b>        |                      |                                                              | -0.04%                                                       | -0.10%                             |
| synObs_IDP_noise | VolRMSE       | $6.23 \times 10^{-3}$ | $3.54 \times 10^{-5}$ | 0.160                  | $1.14 \times 10^{-3}$ | 118                  | $2.187 \times 10^{-4}$                                       | $2.186 \times 10^{-4}$                                       | 27.072                             |
|                  |               | +3.76%                | <b>+17.85%</b>        | <b>-50.00%</b>         | -4.86%                |                      |                                                              | -0.07%                                                       | -0.05%                             |
| synObs_IDP_noise | VarRMSE       | $7.43 \times 10^{-3}$ | $1.36 \times 10^{-5}$ | 0.160                  | $3.39 \times 10^{-3}$ | 200                  | $9.549 \times 10^{-1}$                                       | $9.913 \times 10^{-1}$                                       | 27.117                             |
|                  |               | <b>+23.78%</b>        | <b>-54.55%</b>        | <b>-50.00%</b>         | <b>+182.60%</b>       |                      |                                                              | +3.81%                                                       | 0.12%                              |
| synObs_ALL_seas  | RMSE          | $6.87 \times 10^{-3}$ | $4.79 \times 10^{-5}$ | 0.160                  | $1.35 \times 10^{-3}$ | 200                  | $2.183 \times 10^{-4}$                                       | $2.128 \times 10^{-4}$                                       | 26.820                             |
|                  |               | <b>+14.50%</b>        | <b>+59.70%</b>        | <b>-50.00%</b>         | <b>+12.24%</b>        |                      |                                                              | -2.49%                                                       | -0.98%                             |
| synObs_ALL_seas  | VolRMSE       | $7.77 \times 10^{-3}$ | $2.20 \times 10^{-5}$ | 6.962                  | $3.75 \times 10^{-3}$ | 106                  | $1.944 \times 10^{-4}$                                       | $1.786 \times 10^{-4}$                                       | 26.540                             |
|                  |               | <b>+29.45%</b>        | <b>-26.65%</b>        | <b>+2075.63%</b>       | <b>+212.50%</b>       |                      |                                                              | -8.09%                                                       | -2.01%                             |
| synObs_ALL_seas  | RMAE          | $6.72 \times 10^{-3}$ | $4.08 \times 10^{-5}$ | 0.179                  | $1.27 \times 10^{-3}$ | 200                  | $1.071 \times 10^{-2}$                                       | $1.049 \times 10^{-2}$                                       | 27.025                             |
|                  |               | <b>+12.01%</b>        | <b>+35.98%</b>        | <b>-43.96%</b>         | +5.77%                |                      |                                                              | -2.08%                                                       | -0.22%                             |
| synObs_IDP+_seas | RMSE          | $6.37 \times 10^{-3}$ | $2.89 \times 10^{-5}$ | 0.619                  | $1.69 \times 10^{-3}$ | 51                   | $1.731 \times 10^{-4}$                                       | $1.703 \times 10^{-4}$                                       | 26.881                             |
|                  |               | +6.09%                | -3.51%                | <b>+93.54%</b>         | <b>+40.66%</b>        |                      |                                                              | -1.59%                                                       | -0.75%                             |
| synObs_IDP_seas  | RMSE          | $5.86 \times 10^{-3}$ | $2.19 \times 10^{-5}$ | 1.428                  | $1.83 \times 10^{-3}$ | 55                   | $1.619 \times 10^{-4}$                                       | $1.585 \times 10^{-4}$                                       | 26.897                             |
|                  |               | -2.37%                | <b>-26.84%</b>        | <b>+346.14%</b>        | <b>+52.12%</b>        |                      |                                                              | -2.13%                                                       | -0.69%                             |
| synObs_IDP_seas  | VolRMSE       | $4.88 \times 10^{-3}$ | $1.07 \times 10^{-5}$ | 7.042                  | $2.80 \times 10^{-3}$ | 90                   | $1.875 \times 10^{-4}$                                       | $1.644 \times 10^{-4}$                                       | 26.733                             |
|                  |               | <b>-18.62%</b>        | <b>-64.47%</b>        | <b>+2100.63%</b>       | <b>+133.23%</b>       |                      |                                                              | <b>-12.35%</b>                                               | -1.30%                             |
| synObs_IDP_seas  | RMAE          | $6.50 \times 10^{-3}$ | $2.94 \times 10^{-5}$ | 0.184                  | $1.45 \times 10^{-3}$ | 200                  | $8.349 \times 10^{-3}$                                       | $8.237 \times 10^{-3}$                                       | 27.093                             |

|                  |           |                       |                       |          |                       |          |                        |                        |         |         |
|------------------|-----------|-----------------------|-----------------------|----------|-----------------------|----------|------------------------|------------------------|---------|---------|
|                  |           |                       | +8.40%                | -1.99%   | -42.37%               | +21.00%  |                        |                        | -1.35%  | 0.03%   |
| synObs_IDP_seas  | BasinRMSE | 6.60×10 <sup>-3</sup> | 5.70×10 <sup>-5</sup> | 0.160    | 9.81×10 <sup>-4</sup> | 200      | 7.673×10 <sup>-4</sup> | 7.407×10 <sup>-4</sup> | 26.950  |         |
|                  |           |                       | +10.07%               | +89.96%  | -50.00%               | -18.26%  |                        |                        | -3.47%  | -0.50%  |
| synObs_IDP_seas  | BasinMAE  | 6.63×10 <sup>-3</sup> | 5.32×10 <sup>-5</sup> | 0.160    | 9.76×10 <sup>-4</sup> | 200      | 4.610×10 <sup>-2</sup> | 4.456×10 <sup>-2</sup> | 27.043  |         |
|                  |           |                       | +10.52%               | +77.43%  | -50.00%               | -18.71%  |                        |                        | -3.34%  | -0.15%  |
| synObs_ALL_circ  | RMSE      | 7.00×10 <sup>-3</sup> | 6.00×10 <sup>-5</sup> | 0.160    | 1.35×10 <sup>-3</sup> | 143      | 1.311×10 <sup>-3</sup> | 1.303×10 <sup>-3</sup> | 26.596  |         |
|                  |           |                       | +16.70%               | +100.00% | -50.00%               | +12.71%  |                        |                        | -0.66%  | -1.80%  |
| synObs_ALL_circ  | VolRMSE   | 6.00×10 <sup>-4</sup> | 6.00×10 <sup>-5</sup> | 7.050    | 1.39×10 <sup>-3</sup> | 68       | 4.580×10 <sup>-3</sup> | 1.367×10 <sup>-3</sup> | 23.072  |         |
|                  |           |                       | -90.00%               | +100.00% | +2103.13%             | +15.45%  |                        |                        | -70.15% | -14.82% |
| synObs_ALL_circ  | RMAE      | 6.10×10 <sup>-3</sup> | 3.86×10 <sup>-5</sup> | 0.162    | 1.09×10 <sup>-3</sup> | 76       | 2.652×10 <sup>-2</sup> | 2.651×10 <sup>-2</sup> | 26.964  |         |
|                  |           |                       | +1.71%                | +28.57%  | -49.33%               | -9.04%   |                        |                        | -0.04%  | -0.44%  |
| synObs_IDP+_circ | RMSE      | 6.19×10 <sup>-3</sup> | 6.00×10 <sup>-5</sup> | 0.162    | 9.30×10 <sup>-4</sup> | 134      | 1.162×10 <sup>-3</sup> | 1.155×10 <sup>-3</sup> | 26.761  |         |
|                  |           |                       | +3.10%                | +99.86%  | -49.52%               | -22.46%  |                        |                        | -0.63%  | -1.20%  |
| synObs_IDP+_circ | RMAE      | 5.17×10 <sup>-3</sup> | 1.13×10 <sup>-5</sup> | 2.074    | 3.75×10 <sup>-3</sup> | 81       | 2.661×10 <sup>-2</sup> | 2.636×10 <sup>-2</sup> | 26.065  |         |
|                  |           |                       | -13.77%               | -62.39%  | +548.23%              | +212.26% |                        |                        | -0.95%  | -3.76%  |
| synObs_IDP+_circ | BasinMAE  | 5.91×10 <sup>-3</sup> | 6.00×10 <sup>-5</sup> | 0.160    | 1.12×10 <sup>-3</sup> | 121      | 1.498×10 <sup>-1</sup> | 1.491×10 <sup>-1</sup> | 26.354  |         |
|                  |           |                       | -1.56%                | +100.00% | -50.00%               | -6.90%   |                        |                        | -0.45%  | -2.70%  |
| synObs_IDP_circ  | RMSE      | 6.14×10 <sup>-3</sup> | 6.00×10 <sup>-5</sup> | 0.160    | 9.41×10 <sup>-4</sup> | 94       | 1.180×10 <sup>-3</sup> | 1.173×10 <sup>-3</sup> | 26.722  |         |
|                  |           |                       | +2.36%                | +100.00% | -50.00%               | -21.60%  |                        |                        | -0.65%  | -1.34%  |
| synObs_IDP_circ  | VolRMSE   | 6.00×10 <sup>-4</sup> | 6.00×10 <sup>-5</sup> | 7.050    | 1.73×10 <sup>-3</sup> | 78       | 1.291×10 <sup>-3</sup> | 1.152×10 <sup>-3</sup> | 22.117  |         |
|                  |           |                       | -90.00%               | +100.00% | +2103.13%             | +44.53%  |                        |                        | -10.80% | -18.34% |
| synObs_IDP_circ  | RMAE      | 4.06×10 <sup>-3</sup> | 3.62×10 <sup>-5</sup> | 0.160    | 8.99×10 <sup>-4</sup> | 66       | 2.674×10 <sup>-2</sup> | 2.630×10 <sup>-2</sup> | 25.842  |         |
|                  |           |                       | -32.36%               | +20.78%  | -50.00%               | -25.08%  |                        |                        | -1.65%  | -4.59%  |
| synObs_IDP_circ  | BasinRMSE | 6.28×10 <sup>-3</sup> | 6.00×10 <sup>-5</sup> | 0.160    | 1.45×10 <sup>-3</sup> | 113      | 7.021×10 <sup>-3</sup> | 6.936×10 <sup>-3</sup> | 26.136  |         |
|                  |           |                       | +4.61%                | +100.00% | -50.00%               | +20.48%  |                        |                        | -1.21%  | -3.50%  |
| synObs_IDP_circ  | BasinMAE  | 5.58×10 <sup>-3</sup> | 6.00×10 <sup>-5</sup> | 0.160    | 1.01×10 <sup>-3</sup> | 106      | 1.507×10 <sup>-1</sup> | 1.500×10 <sup>-1</sup> | 26.316  |         |
|                  |           |                       | -7.03%                | +100.00% | -50.00%               | -16.06%  |                        |                        | -0.47%  | -2.84%  |

**Table S3.** Description and results of additional optimisation.

| Parent experiment | Misfit metric             | Adaption                                                                                                          | $a_{Zn}$              | $b_{Zn}$              | $c_{Zn}$               | $L$                   | Number of iterations | $M_{parent}$            | $M_{optimised}$         | Globally integrated Zn uptake flux |
|-------------------|---------------------------|-------------------------------------------------------------------------------------------------------------------|-----------------------|-----------------------|------------------------|-----------------------|----------------------|-------------------------|-------------------------|------------------------------------|
|                   |                           |                                                                                                                   | (-)                   | ( $\mu\text{M}$ )     | ( $\mu\text{M}^{-1}$ ) | ( $\mu\text{M}$ )     |                      | ( $\mu\text{M}^{1/2}$ ) | ( $\mu\text{M}^{1/2}$ ) | ( $\text{Mmol yr}^{-1}$ )          |
| synObs_IDP_circ   | RMAE (Eq. 5 in main text) | $w_{ij}$ obtained from $nObs_j$ in synObs_IDP+_circ when distinguishing between five ocean basins (see main text) | $4.28 \times 10^{-3}$ | $5.37 \times 10^{-5}$ | 0.161                  | $6.95 \times 10^{-4}$ | 182                  | $2.630 \times 10^{-2}$  | $2.640 \times 10^{-2}$  | 25.953                             |

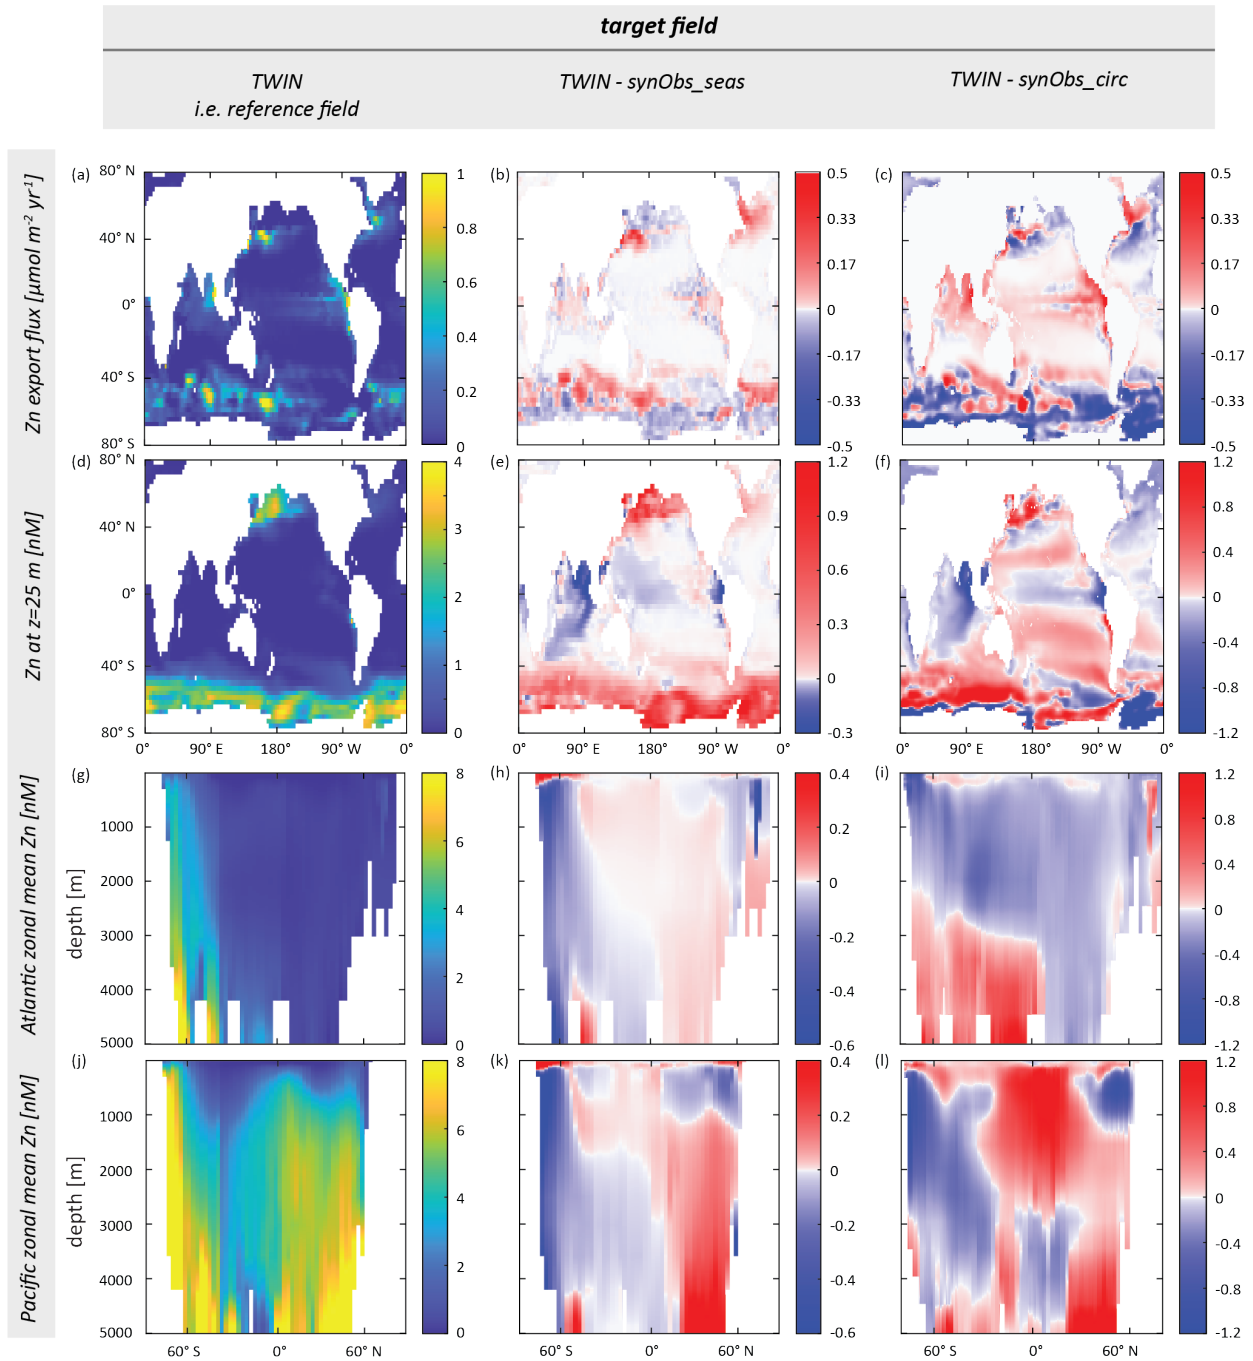

**Figure S1.** Maps of surface Zn concentration [nM] (first row), and zonal mean Zn concentration for the Atlantic (second row) and the Pacific (third row), showing the reference Zn field (first column), the difference between this field and the target field in synObs\_seas (second column) and synObs\_circ (third column) experiments.

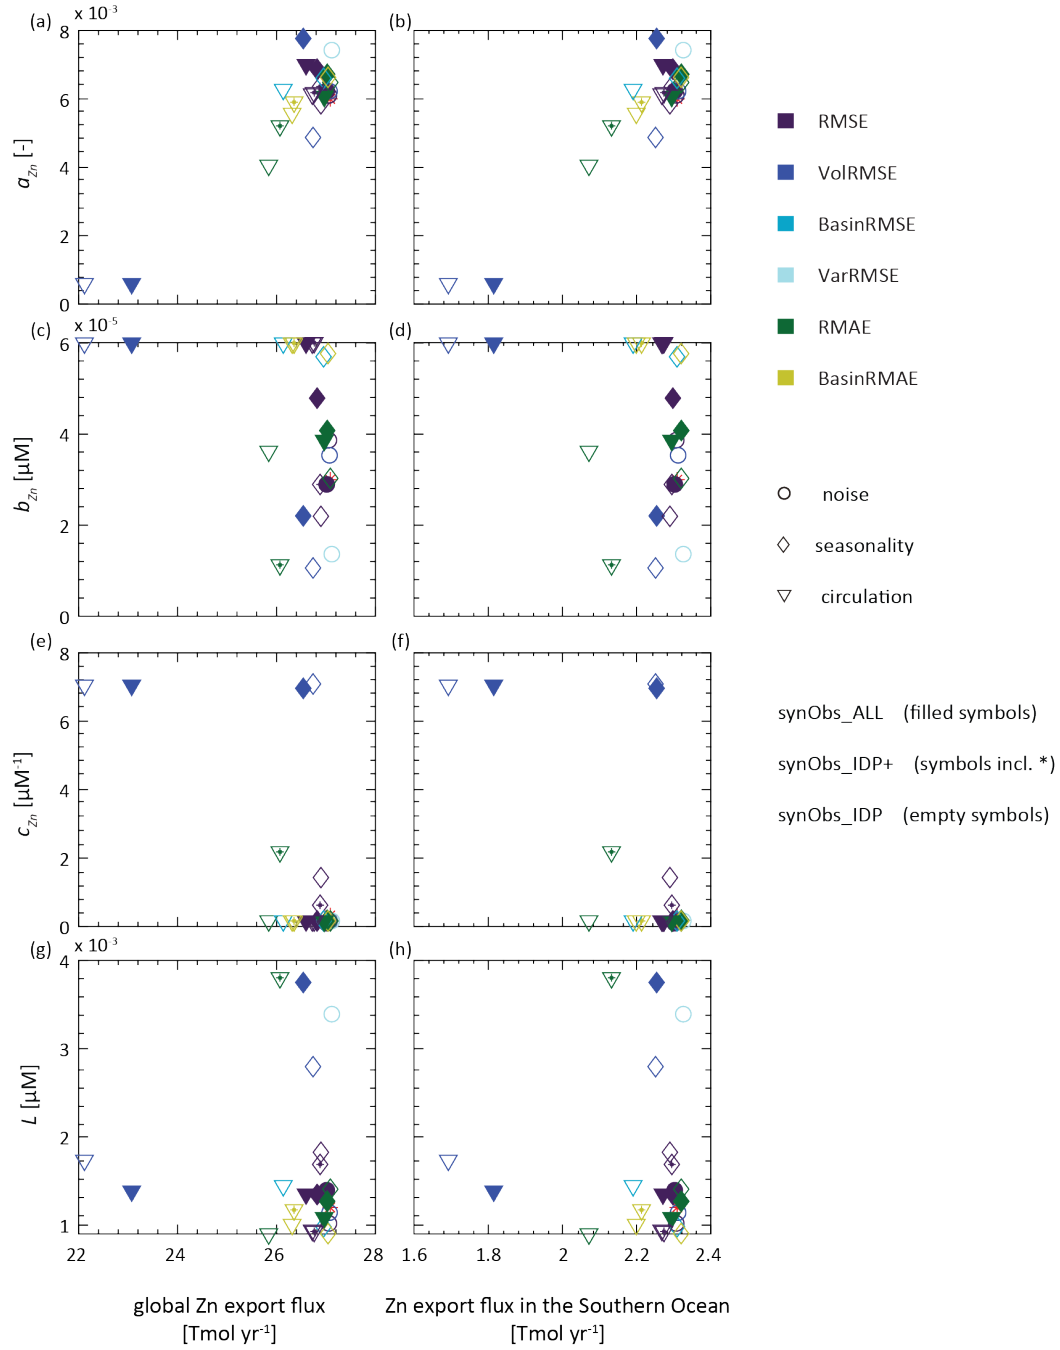

**Figure S2.** Zn export flux integrated globally (first column) and over the Southern Ocean (>50° S; second column) versus optimised parameter values from synObs experiments.

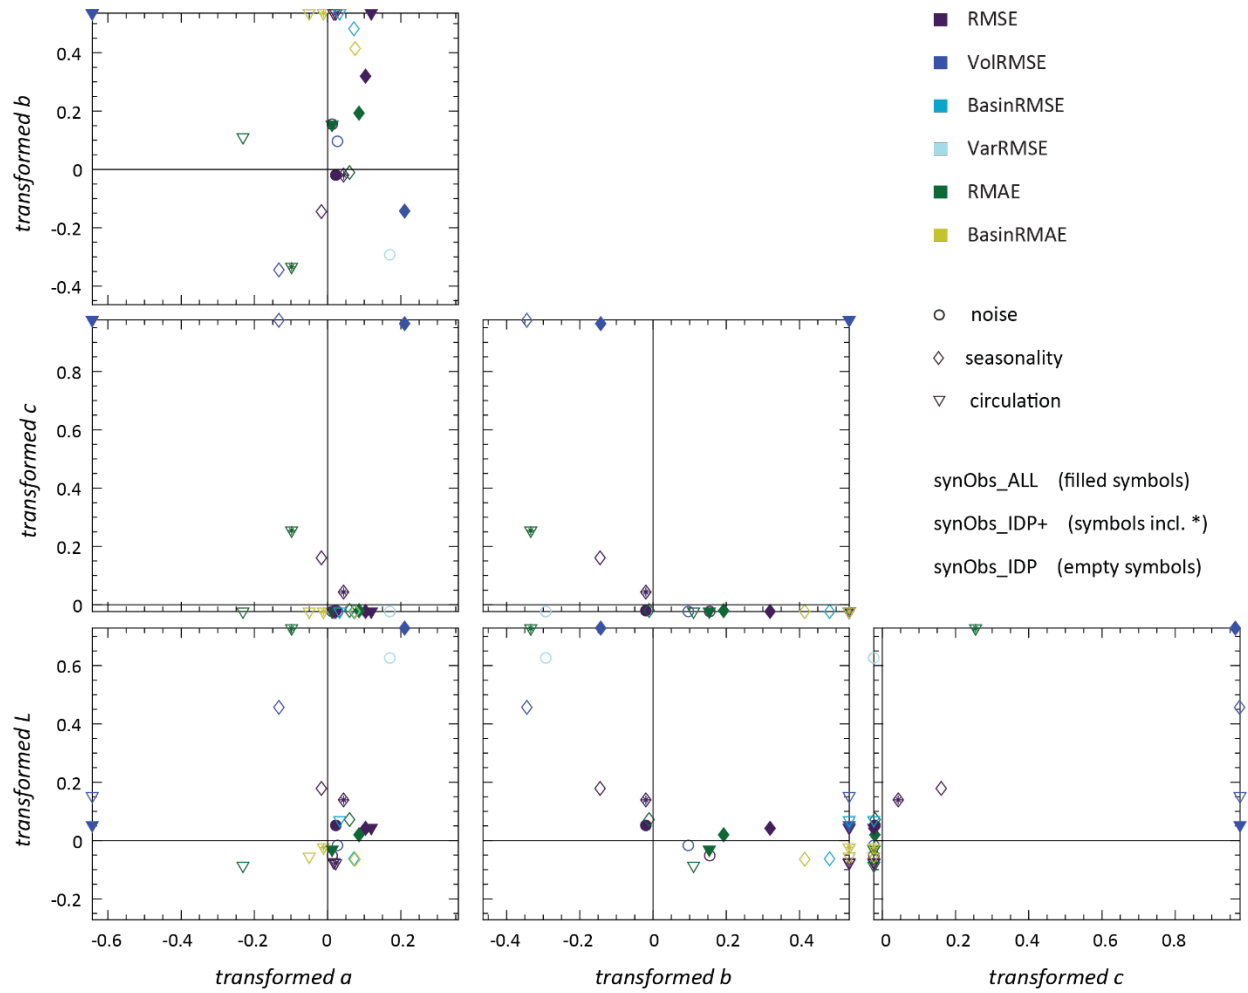

**Figure S3.** Relationship between optimised parameter values. Parameter values are transformed by rescaling each parameter space to an interval of unit length, and shifting this space such that zero corresponds to the reference value.

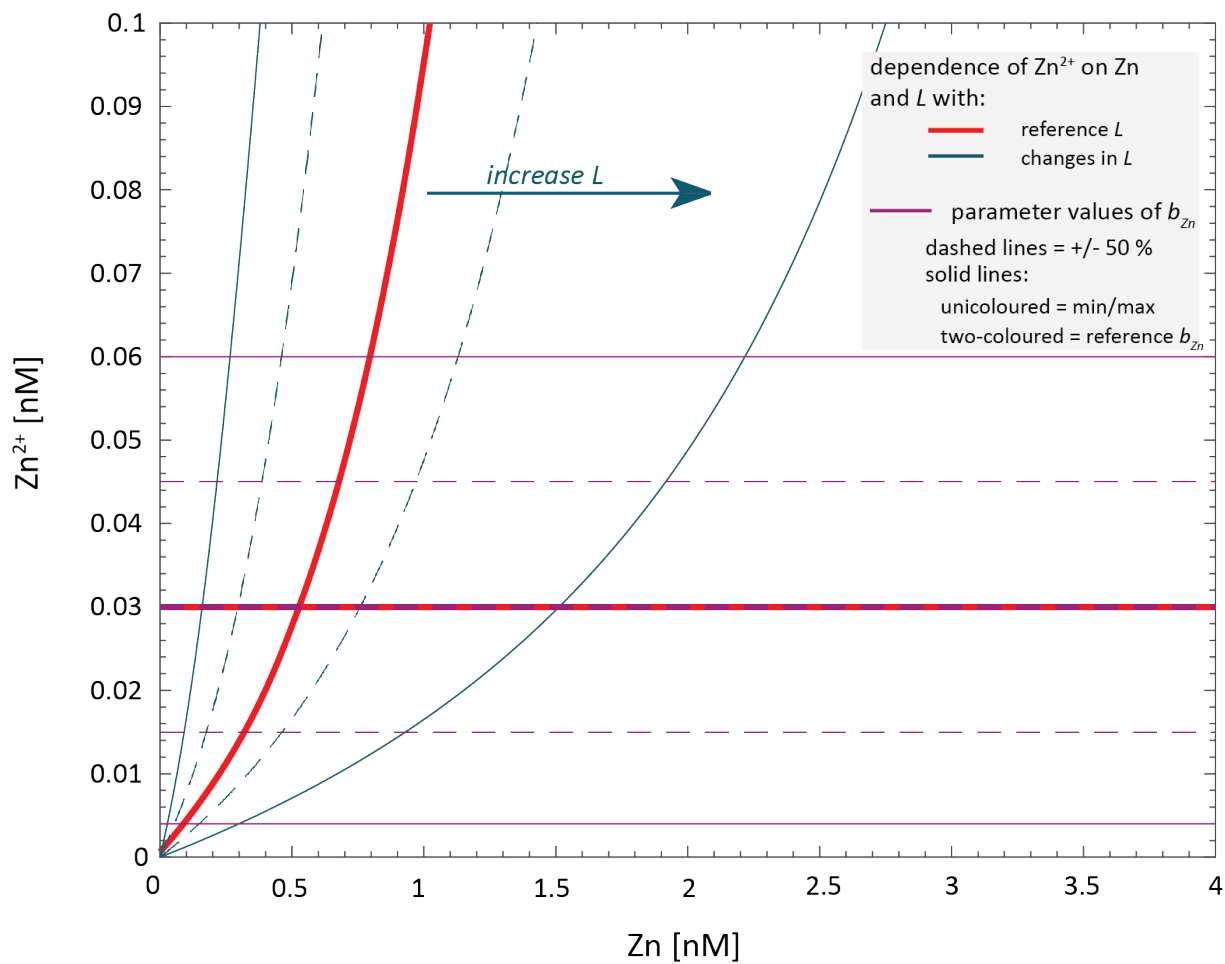

**Figure S4.** Concentration of  $Zn^{2+}$  versus total Zn calculated with reference values of  $b_{Zn}$  and  $L$  (red lines), and changes in each of these two parameters in turquoise and purple respectively.



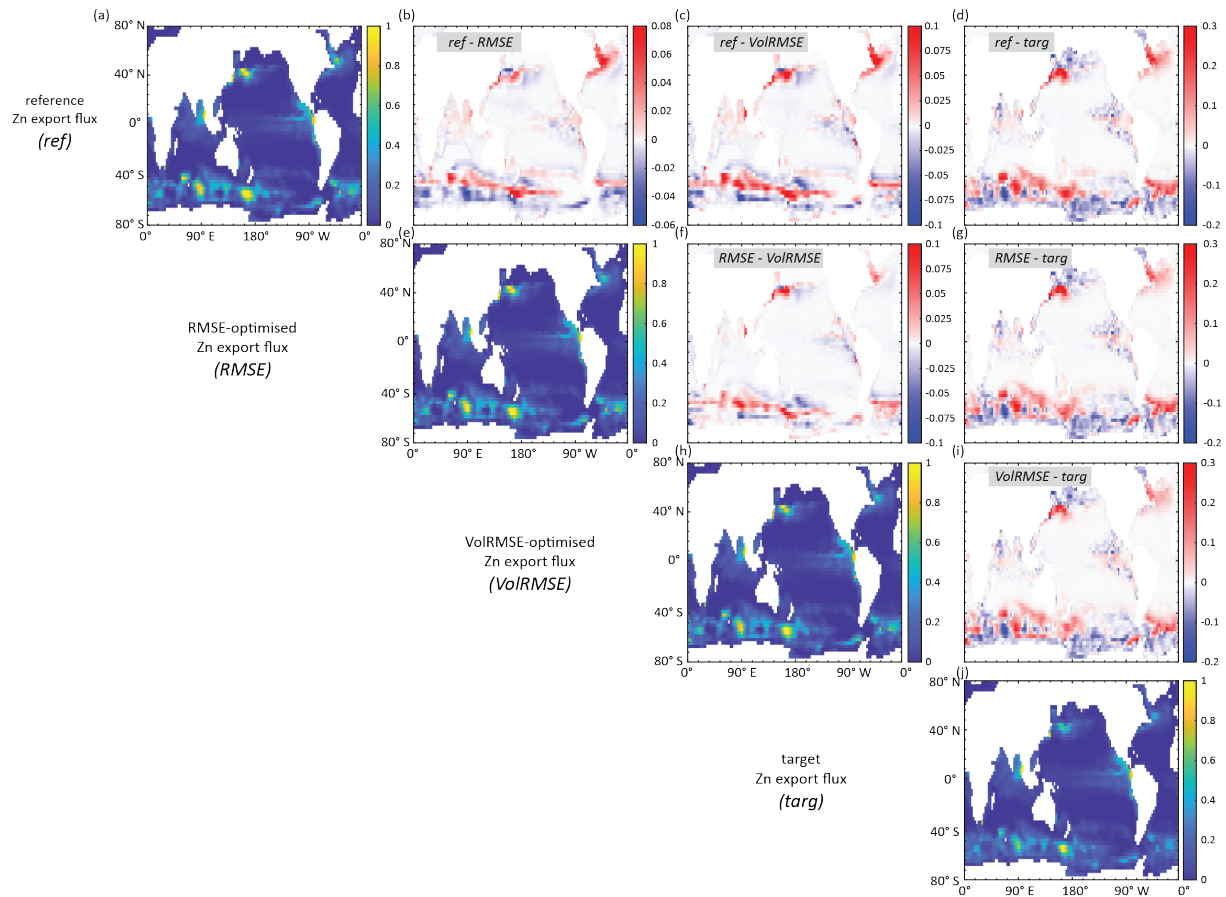

**Figure S5.** Global maps of annual Zn flux across the base of the euphotic zone ( $z_e=120\text{m}$ ), obtained with **(a)** the reference parameters, **(e)** the RMSE-optimised and **(h)** VoIRMSE-optimised parameters from experiment `synObs_ALL_seas`, and **(j)** the reference parameters while simulating seasonal variability (target of `synObs_seas` experiments). The other panels show the differences obtained when subtracting the Zn export flux in the panel below from the panel on the left. Note the different color scales in each column when plotting difference.

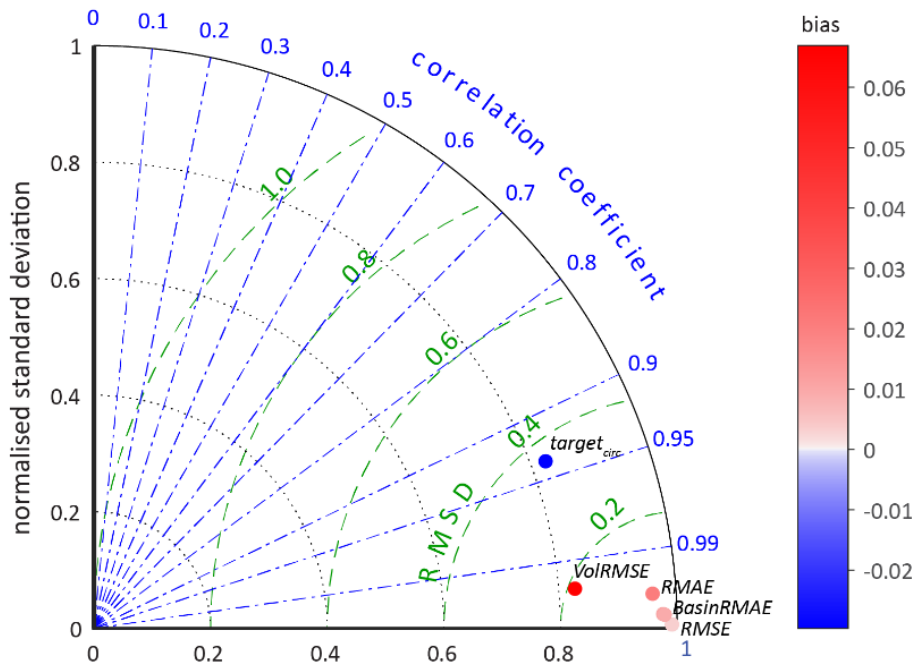

**Figure S6.** Taylor diagram comparing the target field applied in synObs\_IDP\_circ experiments ( $target_{circ}$ ), and optimised fields obtained with different misfit functions in that experiment type, with the reference field. Even large differences in Zn uptake resulting from the very different uptake systematics of the VoIRMSE-optimised experiment (Fig. 6f in the main text) cannot produce a Zn field as different from the reference field as the target field, which was produced with a different circulation model.

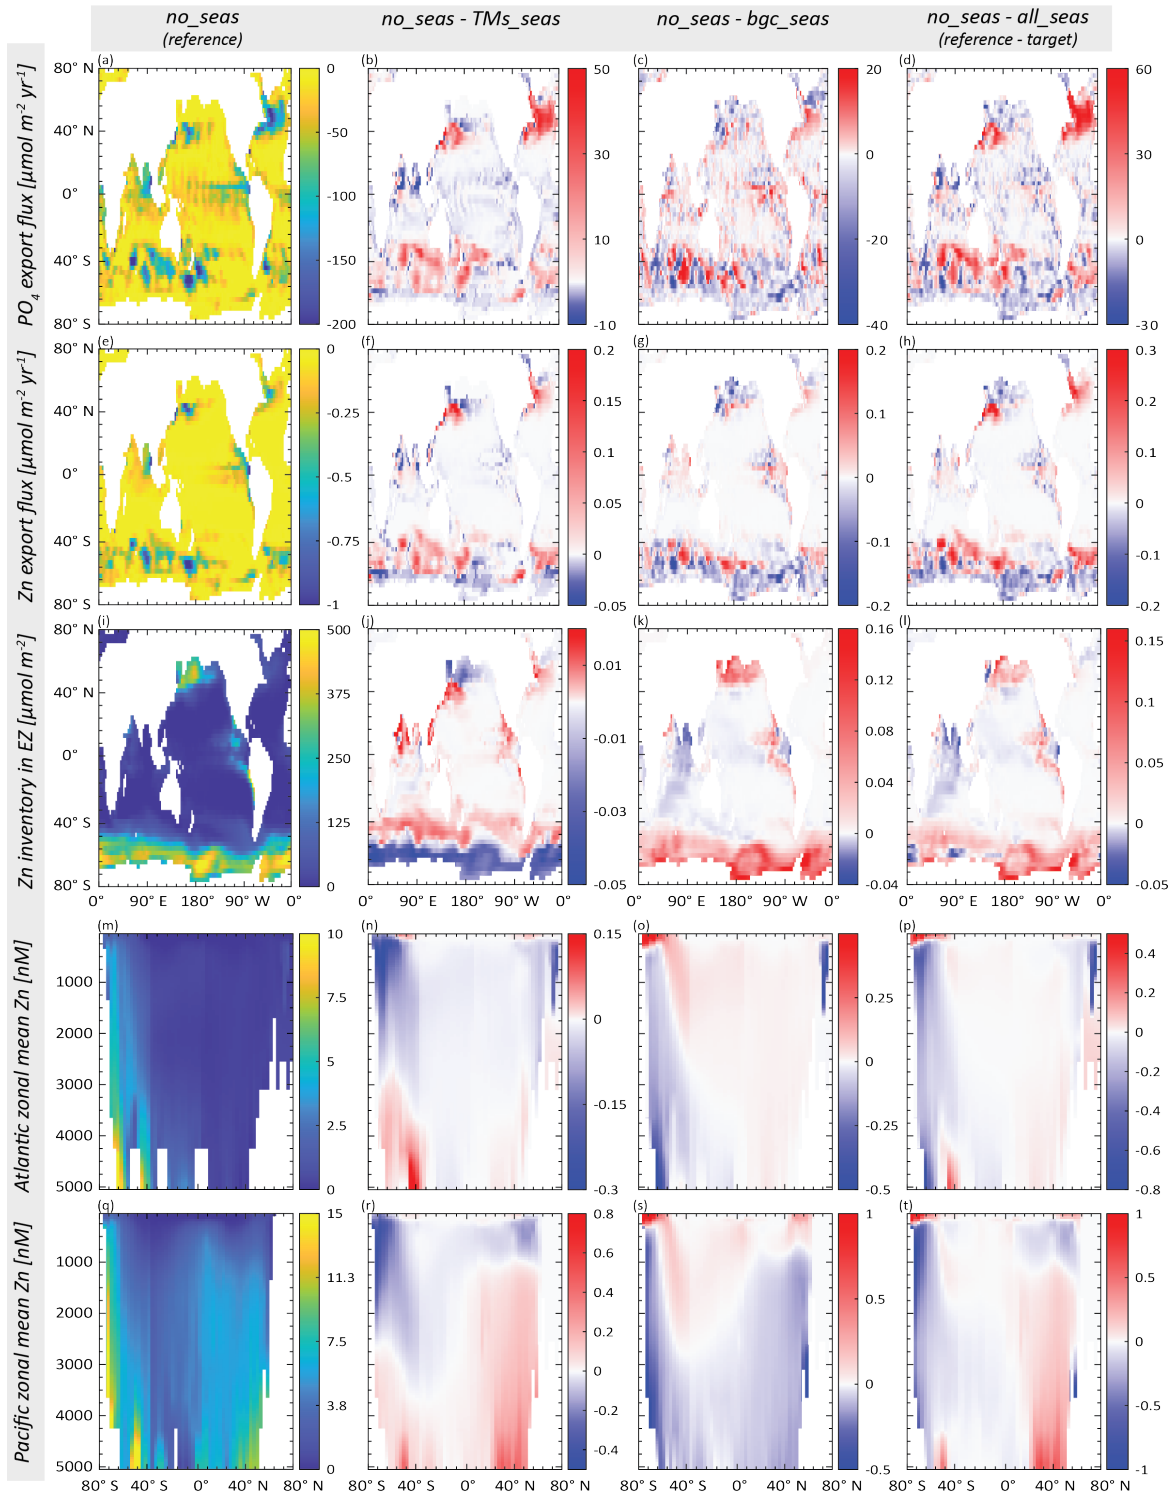

**Figure S7.** Influence of seasonality in circulation and biogeochemistry on Zn cycling and fields in MITgcm-2.8. The first column shows results obtained with the reference simulation, which uses annual mean TMs. The second, third, and fourth columns illustrate differences obtained when seasonality is simulated for either only circulation (monthly mean TMs; second column), only biogeochemistry only (restoring towards seasonal  $\text{PO}_4$  fields; third column), or both simultaneously (target field for synObs\_seas; fourth column). The first and second row visualise export fluxes for  $\text{PO}_4$  and Zn respectively. The subsequent rows illustrate the (differences in) Zn inventory in the euphotic zone (third row), and zonal mean concentrations in the Atlantic (fourth row) and the Pacific (fifth row).

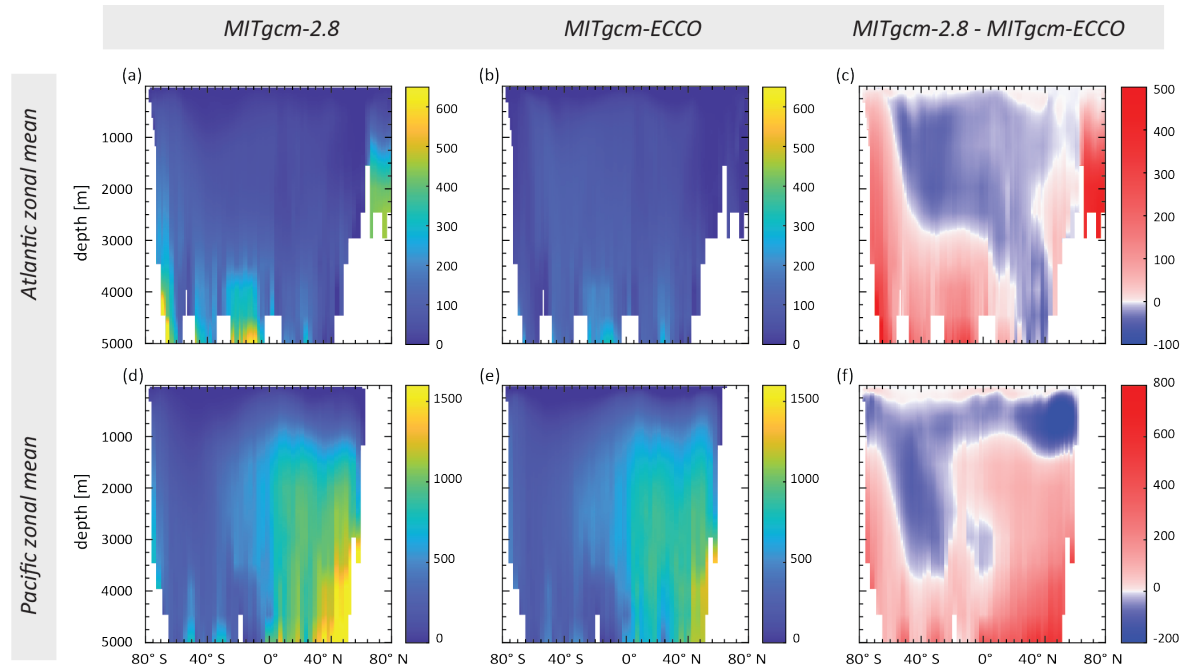

**Figure S8.** Ideal age (Thiele and Sarmiento, 1990) distribution in MITgcm-2.8 (first column) and MITgcm-ECCO (second column), zonally-averaged fields for the Atlantic (first row) and the Pacific (second row).

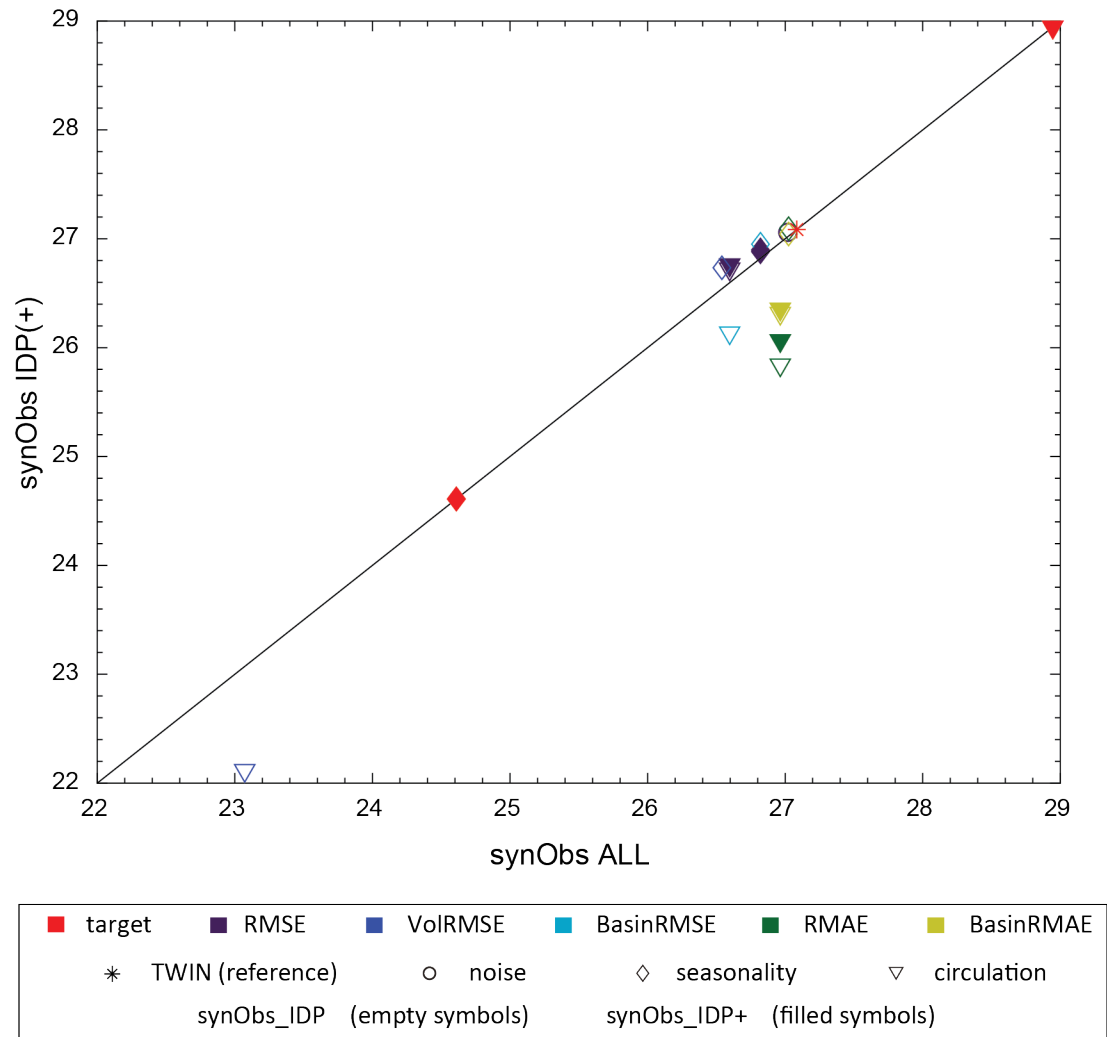

**Figure S9.** Integrated Zn export fluxes obtained in synObs\_IDP(+) experiments vs. those obtained in the corresponding synObs\_ALL experiments.

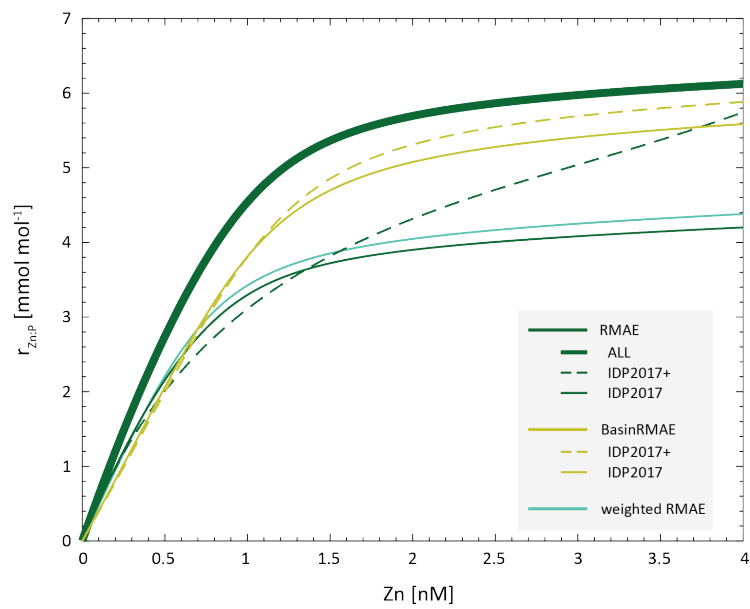

**Figure S10.** Optimised uptake systematics for synObs\_IDP\_circ obtained with a weighted RMAE (turquoise line), for which weights were determined based on the number of observations in IDP+ located in each ocean region used for BasinRMAE (Table S3). For comparison, the plot also shows RMAE-optimised uptake systematics obtained with synObs\_ALL\_circ (bold dark green line), synObs\_IDP+\_circ (dashed dark green line), and synObs\_IDP\_circ (solid dark green line), as well as BasinRMAE-optimised uptake systematics obtained with synObs\_IDP+\_circ (dashed light green line) and with synObs\_IDP\_circ (solid light green line).

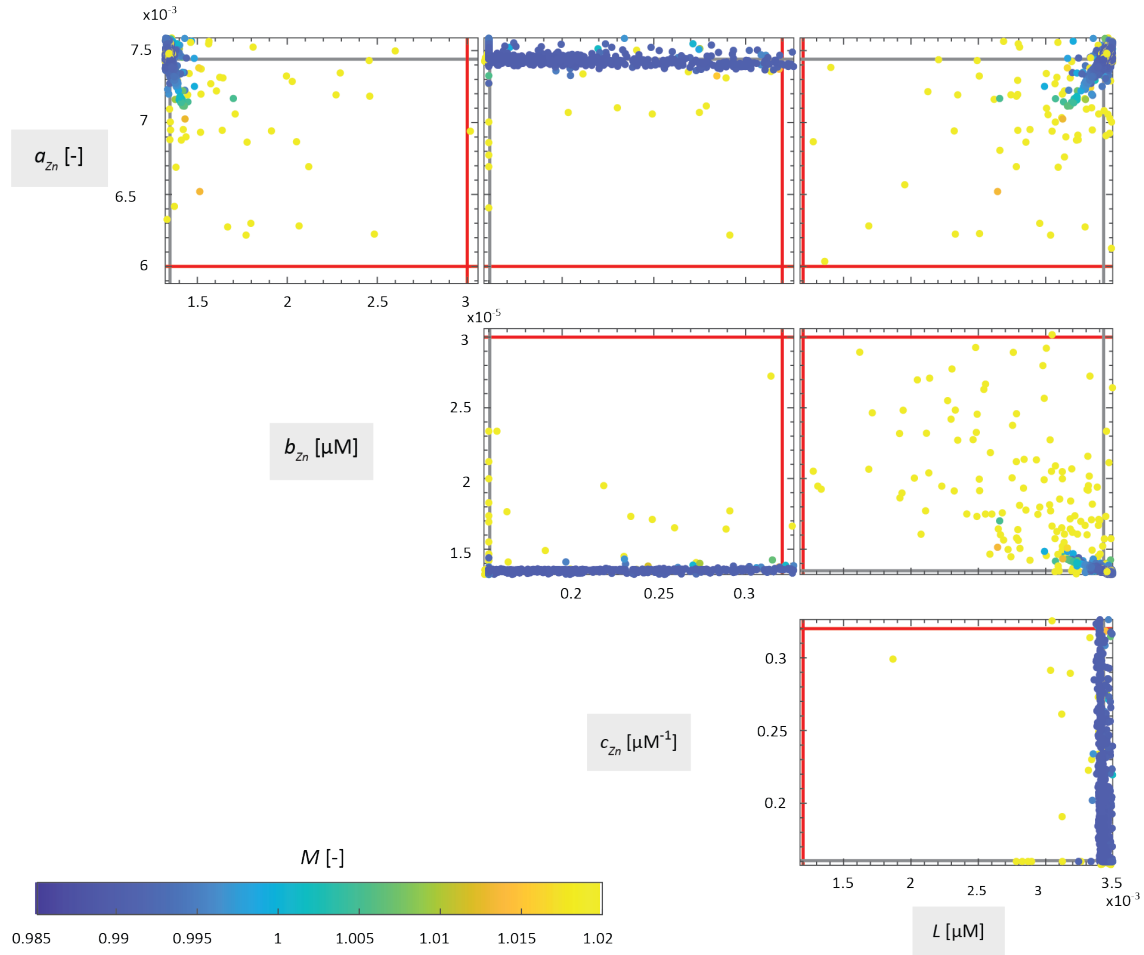

**Figure S11.** Misfit topography obtained in synObs\_IDP\_noise using VarRMSE misfit function. The misfit values are plotted for parameter regions covering  $\pm 2\%$  of the optimised parameter value (grey line) and the reference value (red line).

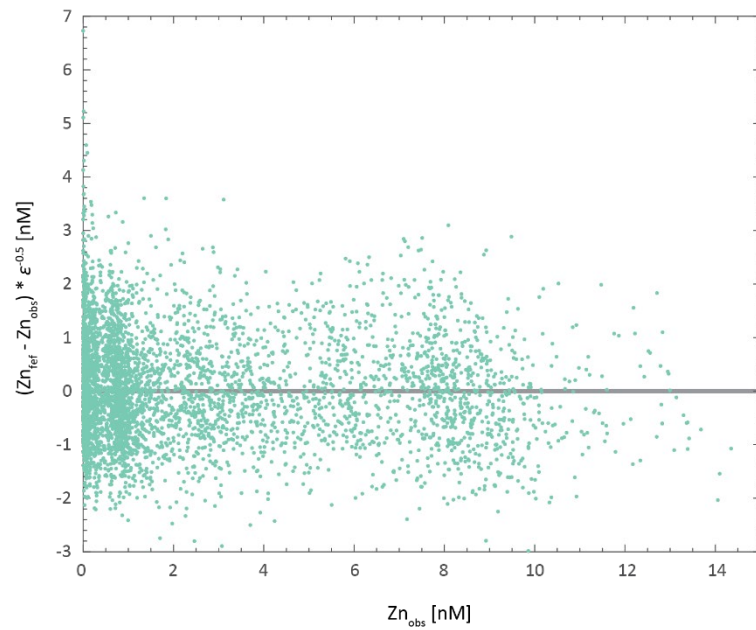

**Figure S12.** Standardised residuals between the reference field ( $Zn_{ref}$ ) and the synObs\_noise target field ( $Zn_{obs}$ ). Note that the standard deviation  $\epsilon^{0.5}$  used for normalisation is based on  $Zn_{obs}$ , which itself is based on  $\epsilon(Zn_{ref})$ .

## References

Thiele, G. and Sarmiento, J. L.: Tracer dating and ocean ventilation, *Journal of Geophysical Research: Oceans*, 95, 9377-9391, <https://doi.org/10.1029/JC095iC06p09377>, 1990.
